# Supplementary material for: Paclitaxel-loaded PLGA microspheres with a novel morphology to facilitate drug delivery and antitumor efficiency
Source: Royal Society of Chemistry journal article supplement (doi:10.1039/c7ra12683b), 2018-01-01
Supplement: c7ra12683b1.pdf [file c7ra12683b1.pdf]

## Supporting Information

Paclitaxel-loaded PLGA microspheres with a novel morphology to facilitate the drug delivery and antitumor efficiency

Zongrui Zhang,<sup>ab</sup> Xinyu Wang,<sup>\*ab</sup> Binbin Li,<sup>ab</sup> Yuanjing Hou,<sup>ab</sup> Zhengwei Cai,<sup>ab</sup> Jing Yang,<sup>c</sup> and Yi Li<sup>d</sup>

<sup>a</sup>State Key Laboratory of Advanced Technology for Materials Synthesis and Processing, Wuhan University of Technology, Wuhan 430070, China. E-mail: wangxinyu@whut.edu.cn; Fax: +86-27-87880734; Tel: +86-27-87651853

<sup>b</sup>Biomedical Materials and Engineering Research Center of Hubei Province, Wuhan 430070, China

<sup>c</sup>School of Foreign Languages, Wuhan University of Technology, Wuhan 430070, China

<sup>d</sup>Institute of Textiles and Clothing, The Hong Kong Polytechnic University, Hung Hom, Kowloon, Hong Kong, P.R. China

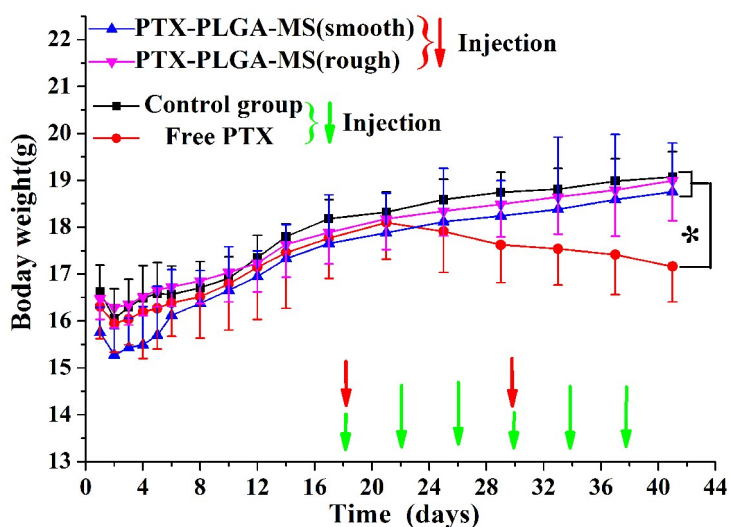

**Figure S1.** Body weight variations of mice treated by saline, free PTX, rough and smooth PTX-PLGA-MS. \*,  $p < 0.05$ .
